# Supplementary material
Source: Springer Nature journal article supplement (https://www.springermedizin.de/resource/supplementary/12958_2006_360_MOESM1_ESM.pdf/9567732)

**A**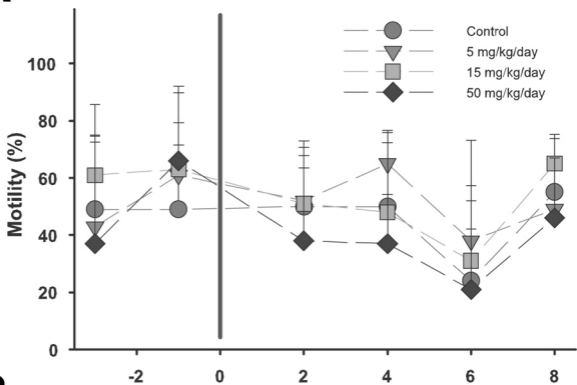**B**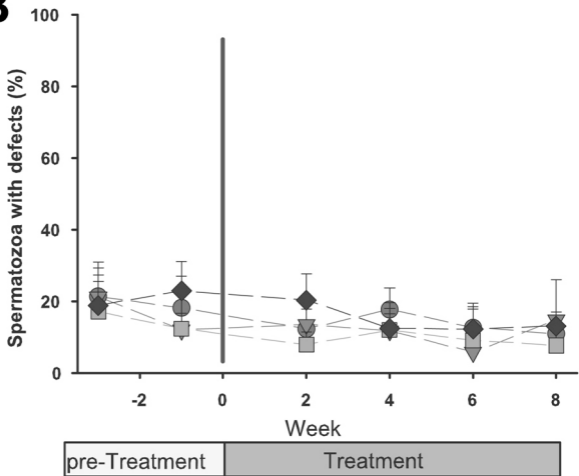

Supplement: MOESM1 [file 9567732]
